# Supplementary material for: Testicular Germ Cell Tumor Tissue Biomarker Analysis: A Comparison of Human Protein Atlas and Individual Testicular Germ Cell Tumor Component Immunohistochemistry
Source: MDPI journal article supplement (doi:10.3390/cells12141841), 2023-07-13
Supplement: s1 [file s1]

| Gene   | Database | Value       |                         |
|--------|----------|-------------|-------------------------|
| POU5F1 | HPA      | <b>1.3</b>  | nTPM                    |
|        | GTEX     | 0.8         | nTPM                    |
|        | FANTOM5  | 0           | Scaled Tags Per Million |
|        | TCGA     | 355.9       | FPKM                    |
| NANOG  | HPA      | <b>0.9</b>  | nTPM                    |
|        | GTEX     | 0.2         | nTPM                    |
|        | FANTOM5  | 0           | Scaled Tags Per Million |
|        | TCGA     | 58.1        | FPKM                    |
| SOX2   | HPA      | 1.4         | nTPM                    |
|        | GTEX     | <b>1.9</b>  | nTPM                    |
|        | FANTOM5  | 6.4         | Scaled Tags Per Million |
|        | TCGA     | 20.7        | FPKM                    |
| SOX17  | HPA      | 1.2         | nTPM                    |
|        | GTEX     | <b>3.4</b>  | nTPM                    |
|        | FANTOM5  | 15.6        | Scaled Tags Per Million |
|        | TCGA     | 25.3        | FPKM                    |
| KIT    | HPA      | <b>6.2</b>  | nTPM                    |
|        | GTEX     | 2.3         | nTPM                    |
|        | FANTOM5  | 13.6        | Scaled Tags Per Million |
|        | TCGA     | 28.6        | FPKM                    |
| KITLG  | HPA      | <b>6.3</b>  | nTPM                    |
|        | GTEX     | 0.3         | nTPM                    |
|        | FANTOM5  | 36.8        | Scaled Tags Per Million |
|        | TCGA     | 2.2         | FPKM                    |
| MAGEC2 | HPA      | <b>19.6</b> | nTPM                    |
|        | GTEX     | 17.9        | nTPM                    |
|        | FANTOM5  | 27.4        | Scaled Tags Per Million |
|        | TCGA     | 6.7         | FPKM                    |
| MGMT   | HPA      | 9.9         | nTPM                    |
|        | GTEX     | <b>15.2</b> | nTPM                    |
|        | FANTOM5  | 25.7        | Scaled Tags Per Million |
|        | TCGA     | 5.3         | FPKM                    |
| RASSF1 | HPA      | 19.4        | nTPM                    |
|        | GTEX     | <b>38.5</b> | nTPM                    |
|        | FANTOM5  | 27.7        | Scaled Tags Per Million |
|        | TCGA     | 8           | FPKM                    |
| PRSS21 | HPA      | 27.1        | nTPM                    |
|        | GTEX     | <b>84.6</b> | nTPM                    |
|        | FANTOM5  | 23.1        | Scaled Tags Per Million |
|        | TCGA     | 2.2         | FPKM                    |

|       |         |            |                         |
|-------|---------|------------|-------------------------|
| SALL4 | HPA     | 3          | nTPM                    |
|       | GTEX    | <b>3.9</b> | nTPM                    |
|       | FANTOM5 | 3.4        | Scaled Tags Per Million |
|       | TCGA    | 22.7       | FPKM                    |
| TDGF1 | HPA     | <b>0.5</b> | nTPM                    |
|       | GTEX    | 0.4        | nTPM                    |
|       | FANTOM5 | 0.1        | Scaled Tags Per Million |
|       | TCGA    | 27.1       | FPKM                    |
| DPPA3 | HPA     | <b>0.7</b> | nTPM                    |
|       | GTEX    | 0.4        | nTPM                    |
|       | FANTOM5 | 0.1        | Scaled Tags Per Million |
|       | TCGA    | 339        | FPKM                    |
| CALCA | HPA     | <b>0.2</b> | nTPM                    |
|       | GTEX    | 0.2        | nTPM                    |
|       | FANTOM5 | 0.2        | Scaled Tags Per Million |
|       | TCGA    | 0          | FPKM                    |
| HOXA9 | HPA     | <b>0</b>   | nTPM                    |
|       | GTEX    | 0          | nTPM                    |
|       | FANTOM5 | 2          | Scaled Tags Per Million |
|       | TCGA    | 0.7        | FPKM                    |
