# Supplementary material for: Testicular Germ Cell Tumor Tissue Biomarker Analysis: A Comparison of Human Protein Atlas and Individual Testicular Germ Cell Tumor Component Immunohistochemistry
Source: MDPI journal article supplement (doi:10.3390/cells12141841), 2023-07-13
Supplement: s1 [file s1]

| Antibody | Manufacturer     | Cat. Number | HIER                                               | Dilution | Secondary antibody                                    | Positive control    | Negative control     |
|----------|------------------|-------------|----------------------------------------------------|----------|-------------------------------------------------------|---------------------|----------------------|
| POU5F1   | Abcam            | ab109183    | pH6                                                | 1:750    | REAL EnVision Detection System, HRP/DAB, Rabbit/Mouse | seminoma            | colorectal carcinoma |
| HOXA9    | Atlas Antibodies | HPA061982   | pH9                                                | 1:1300   | REAL EnVision Detection System, HRP/DAB, Rabbit/Mouse | colon               | kidney cancer        |
| SOX2     | Atlas Antibodies | AMAb91307   | pH9                                                | 1:500    | REAL EnVision Detection System, HRP/DAB, Rabbit/Mouse | embryonal carcinoma | muscle               |
| NANOG    | Abcam            | ab106465    | pH6                                                | 1:500    | REAL EnVision Detection System, HRP/DAB, Rabbit/Mouse | seminoma            | colon                |
| PRSS21   | Atlas Antibodies | HPA008477   | pH9                                                | 1:100    | REAL EnVision Detection System, HRP/DAB, Rabbit/Mouse | testis              | colon                |
| RASSF1   | Atlas Antibodies | HPA040735   | pH9                                                | 1:225    | REAL EnVision Detection System, HRP/DAB, Rabbit/Mouse | colon               | kidney cancer        |
| SALL4    | Atlas Antibodies | HPA015291   | pH9                                                | 1:500    | REAL EnVision Detection System, HRP/DAB, Rabbit/Mouse | testis              | colon                |
| MGMT     | Atlas Antibodies | HPA069497   | pH9                                                | 1:500    | REAL EnVision Detection System, HRP/DAB, Rabbit/Mouse | colon               | kidney cancer        |
| TDGF1    | Abcam            | ab19917     | pH6                                                | 1:550    | REAL EnVision Detection System, HRP/DAB, Rabbit/Mouse | ovary               | colon                |
| DPPA3    | Santa Cruz       | sc-376862   | pH9                                                | 1:225    | REAL EnVision Detection System, HRP/DAB, Rabbit/Mouse | TGCT                | colon                |
| CALCA    | Abcam            | ab240922    | pH9                                                | 1:600    | REAL EnVision Detection System, HRP/DAB, Rabbit/Mouse | thyroid             | testis               |
| MAGEC2   | Atlas Antibodies | HPA062230   | pH6                                                | 1:500    | REAL EnVision Detection System, HRP/DAB, Rabbit/Mouse | testis              | liver                |
| SOX17    | Abcam            | ab224637    | pH9                                                | 1:1000   | REAL EnVision Detection System, HRP/DAB, Rabbit/Mouse | seminoma            | liver                |
| KIT      | Dako             | A4502       | En Vision Flex- Target retrieval solution, high Ph | 1:100    | REAL EnVision Detection System, HRP/DAB, Rabbit/Mouse | ovary               | colon                |
| KITLG    | Atlas Antibodies | HPA070395   | pH9                                                | 1:500    | REAL EnVision Detection System, HRP/DAB, Rabbit/Mouse | prostate cancer     | colon                |
| 5mC      | Abcam            | (ab214727)  | pH6                                                | 1000     | REAL EnVision Detection System, HRP/DAB, Rabbit/Mouse |                     |                      |
